# Supplementary material
Source: PubMed Central journal article supplement (PMC4251488)

## Supplemental Figure Legends

### Supplemental Figure 1 related to Figure 1.

**A.** Olfr231 expression in the G9a single KO versus G9a/GLP dKO. Olfr231 ISH (red) at E18.5. Top-most panels are more anterior, bottom panels are posterior. DAPI nuclear dye is blue. **B.** MOR28 immunofluorescence (red) illustrating that unlike in Foxg1-Cre; G9a flox/flox MOE, this OR is expressed. **C.** OMP is expressed at normal levels by chromogenic ISH, suggesting OSNs are normal. **D.** MOR28-IRES-Cre mediated deletion of G9a with R26R mT/mG (Muzumdar et al., 2007) Cre-labeling of neurons illustrate that olfactory bulb targeting is not altered in the absence of G9a.

**Supplemental Figure 2 related to Figure 2:** **A.** Histogram depicting total number of OR genes detected in E18.5 MOE by RNA-seq per genotype, where all are Foxg1-Cre<sup>+</sup> and 3=G9a flox/+, 2=G9aflox/flox, 1=G9aflox/flox;GLPflox/+, and 0=G9aflox/flox;GLPflox/flox. **B.** Boxplot of OR genes with outliers and without outliers (inset) for the same dosage series illustrating the decrease in median (shown as solid differently colored horizontal bar within boxplot). **C.** Cartoon depiction of 3 different hypothetical MOEs with 5 different OSN frequencies and resulting Gini coefficients. **D.** Gini coefficients calculated from Fig. 4D are plotted and show a simple upward trend toward perfect inequality, illustrating that the diversity of OSNs in the dKO is severely diminished compared to control MOE. **E.** RNA-seq values across two genotypes for a set of marker

genes specific to the following stages: mature OSN (Adcy3, OMP, Slc17a6 (Vglut2), Cnga2), immature neuron (Gap43), progenitor cells (NeuroD1 and Ascl1), and transient OR-choice/immature neuron (Atf5 and Lsd1). **F.** ATF5 (red) and ADCY3 (green) are expressed at similar levels in control and G9a/GLP double KO MOEs at E18.5. **G.** Lsd1 IF illustrating its expression pattern is the same between control and double G9a/GLP double KO MOEs at E18.5 **H.** VGLUT2-positive mature OSN axons target the olfactory bulb in G9a/GLP double KO MOEs at E18.5, suggesting that OSN maturation is not impaired.

**Supplemental Figure 3 related to Figure 3:** **A.** Boxplot depiction of all Refseq OR expression levels as RPKM from SUV4-20 control and dKO RNA-seq experiments. Outliers are shown as individual circles. Median values for each genotype are colored bars, either green (double heterozygote: Foxg1-Cre+; SUV4-20H1fl/+; SUV4-20H2 +/-) or red (double knockout: Foxg1-Cre+; SUV4-20H1 fl/fl; SUV4-20H2 -/-). **B.** Lorenz curve for double heterozygote control versus double knockout SUV4-20 mutant (as shown in Figure 4D). **C.** qRT-PCR from cDNA of control and SUV4-20 dKO MOE at PND21 illustrating the similarity in expression level for Olfr231 and other OR genes. Values for the above experiments represent the mean of technical duplicates; error bar is +/-SEM. **D.** MOR28 IF in the Foxg1-Cre+ control and SUV4-20 dKO MOE at PND21 illustrating the prevalence of this OSN type in the absence of SUV4-20, in contrast to the loss of MOR28 in the G9a/GLP dKO (data not shown). DAPI nuclear stain is blue. **E.** Representative ChIP-qPCR in PND21 SUV4-20 double

knockout illustrates depletion of H4K20me3 at all loci assayed. **F.** ChIP-qPCR in PND21 SUV4-20 double knockout illustrates maintenance of H3K9me3 at all loci assayed despite loss of H4K20me3. Values represent the mean of technical duplicates; error bars are mean +/-SEM.

**Supplemental Figure 4 related to Figure 4:** **A.** Olfr231 FISH (red) in GLP heterozygote and GLP KO MOE at E18.5. **B.** Quantitative RT-PCR from E18.5 MOE cDNA illustrating Olfr231 is upregulated in both G9a and GLP single KOs, and there is a synergistic effect from the removal of both genes. Ubiquitously expressed genes such as TBP remain relatively constantly expressed. Normalized to Act-B. Values represent the mean of technical duplicates; error bars are mean +/-SEM. **C.** G9a immunofluorescence (red) indicating it is expressed in every cell in the MOE at E18.5, indicating that GLP must be coexpressed with G9a (DAPI is shown in blue).

Table S1 related to Figure 1. Non-chemoreceptor genes misregulated in the G9a/GLP double knockout MOE.

| Downregulated genes |               |              |                | Upregulated genes |               |              |                |
|---------------------|---------------|--------------|----------------|-------------------|---------------|--------------|----------------|
| gene                | cont_fpk<br>m | dko_fpk<br>m | cuffdiff_p_val | gene              | cont_fpk<br>m | dko_fpk<br>m | cuffdiff_p_val |
| Ttr                 | 66.9947       | 1.01025      | 0.0003         | Lce1g             | 3.34612       | 16.5146      | 0.0043         |
| Ambn                | 144.032       | 4.36029      | 0.00005        | Sprr2d            | 0             | 3.03183      | 0.00005        |
| Enam                | 34.7472       | 0.435202     | 0.00005        | Tbx18             | 0.75721       | 6.4342       | 0.00005        |
| Amtn                | 22.3772       | 0            | 0.00005        | Pla2g2f           | 2.37024       | 13.3765      | 0.0001         |
| Abpb                | 18.9729       | 0            | 0.00005        | Kremen2           | 0.65967       | 6.2253       | 0.0079         |
| Gm1006              | 25.1943       | 0.363092     | 0.00565        | Ivl               | 1.4299        | 9.72708      | 0.00005        |
| Bpil3               | 13.3564       | 0            | 0.00005        | Lce1e             | 2.85627       | 16.2442      | 0.00375        |
| Odam                | 32.5018       | 1.58375      | 0.00035        | Cxcl14            | 11.2525       | 54.2732      | 0.00005        |
| Car6                | 14.7257       | 0.309201     | 0.00565        | Ggct              | 3.14498       | 18.4711      | 0.00005        |
| Serpina3n           | 23.6058       | 1.2586       | 0.00005        | Dhrs2             | 3.01362       | 19.6933      | 0.0002         |
| Dspp                | 31.709        | 2.57553      | 0.00005        | Casp14            | 2.5689        | 17.5257      | 0.00005        |
| Krt76               | 42.8591       | 4.02448      | 0.00005        | Krtap14           | 0             | 4.26381      | 0.00005        |
| Sult1e1             | 20.3228       | 1.63968      | 0.0001         | Krt79             | 0.595468      | 7.4448       | 0.0016         |
| 5430413K10Rik       | 657.044       | 81.4107      | 0.00005        | Krt10             | 165.101       | 882.976      | 0.00005        |
| Dcpp3               | 41.5419       | 4.608        | 0.00025        | Krtap15           | 0             | 4.41197      | 0.00005        |
| Abpa                | 6.35306       | 0            | 0.00005        | Lce1a2            | 4.76775       | 30.8184      | 0.00135        |
| Rsc1a1              | 6.11259       | 0.00162905   | 0.01185        | Il1f5             | 2.00706       | 15.934       | 0.00005        |
| Rspo4               | 12.8765       | 1.06473      | 0.0002         | Twist2            | 2.70956       | 20.5417      | 0.0016         |
| Lcn13               | 5.66824       | 0            | 0.00005        | Lce1d             | 11.6936       | 74.7501      | 0.00005        |
| 4833413D08Rik       | 41.4009       | 5.39757      | 0.00005        | Lce1a1            | 6.7046        | 45.6865      | 0.00015        |
| Foxf1a              | 15.112        | 1.50601      | 0.02715        | Lce1i             | 3.22069       | 26.6162      | 0.0006         |
| Muc5b               | 26.3138       | 3.25083      | 0.00005        | Flg2              | 0.78783       | 12.5662      | 0.00005        |
| Expi                | 203.021       | 30.9041      | 0.00005        | Lce1b             | 4.73736       | 52.8095      | 0.00015        |
| Sult1c1             | 11.3124       | 0.973546     | 0.00035        | Lce1c             | 5.53744       | 61.6205      | 0.00005        |
| Scgb1c1             | 67.6346       | 12.4039      | 0.00035        | Cyp2b19           | 0.55726       | 17.6213      | 0.00075        |
| Atp2a3              | 20.153        | 3.1582       | 0.00005        | Krt77             | 0.18003       | 18.6752      | 0.0153         |
| E030002O03Rik       | 468.406       | 93.232       | 0.00005        | Stfa3             | 29.544        | 710.325      | 0.00005        |
| Pglyrp1             | 184.271       | 39.1801      | 0.00005        | 2310050C09Rik     | 0             | 49.3986      | 0.00005        |
| Csn3                | 12.0558       | 1.83271      | 0.00025        | Lce1m             | 1.08784       | 104.321      | 0.0049         |
| Cxcl17              | 30.4136       | 5.84761      | 0.02045        | Hba-a1            | 0.0091495     | 347.98       | 0.00695        |
| Ccl21c              | 3.36526       | 0.000572025  | 0.03075        |                   |               |              |                |
| Reg3g               | 389.651       | 89.2604      | 0.00005        |                   |               |              |                |



Figure S1

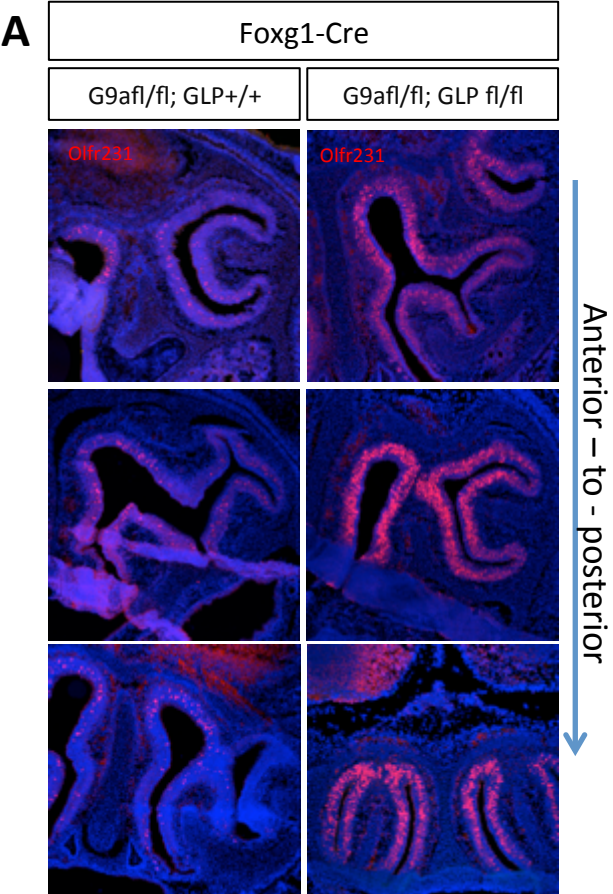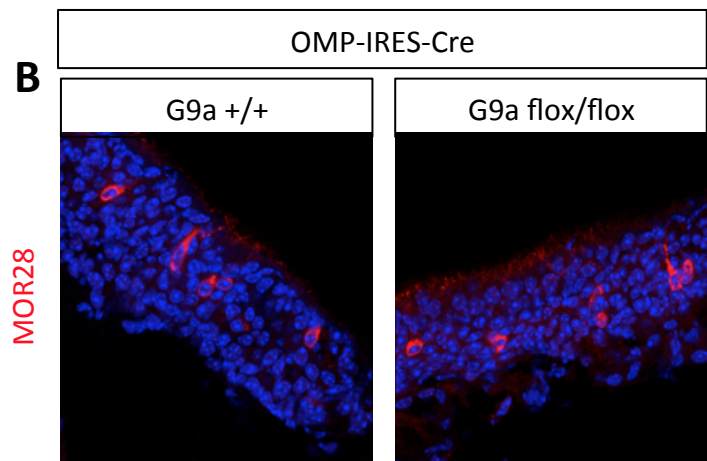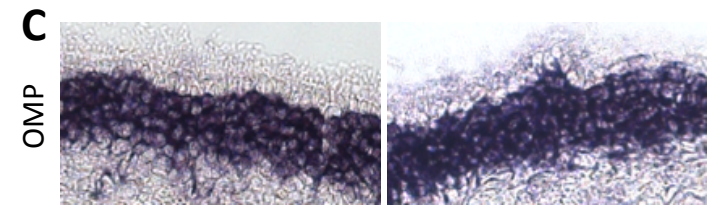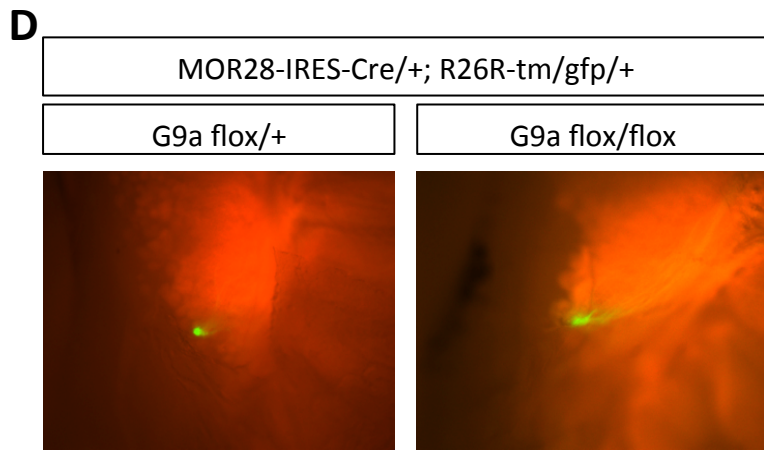

Figure S2

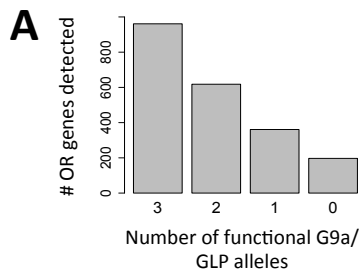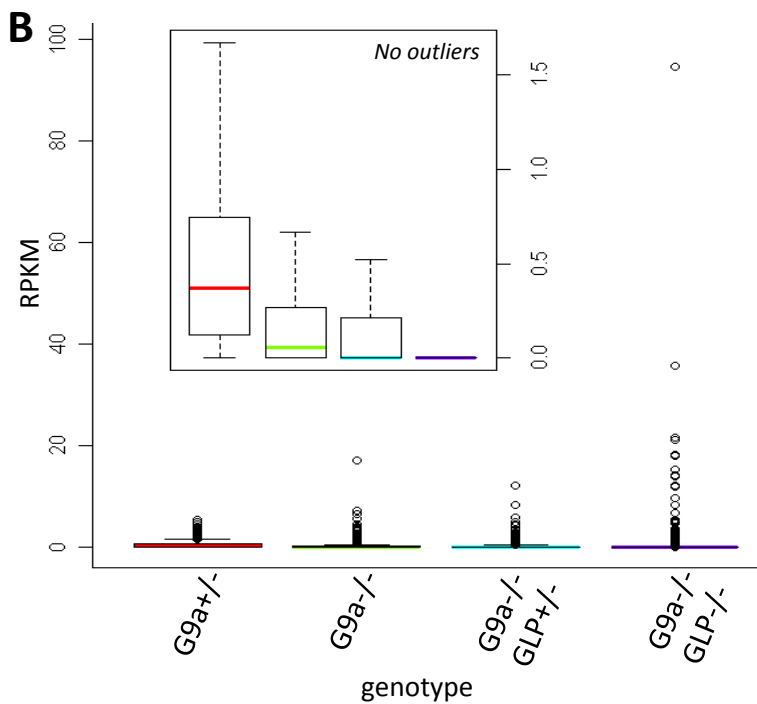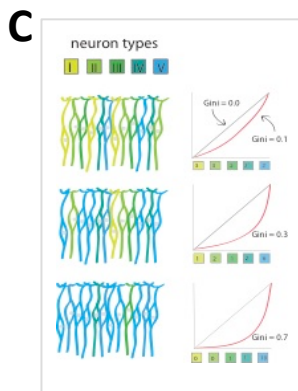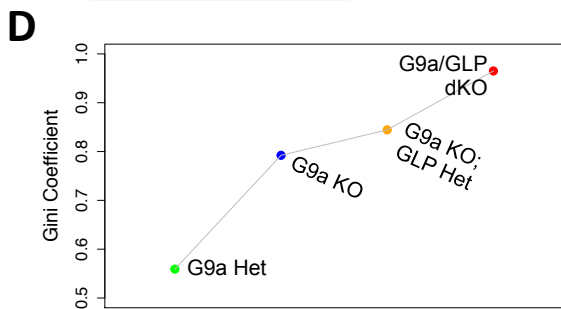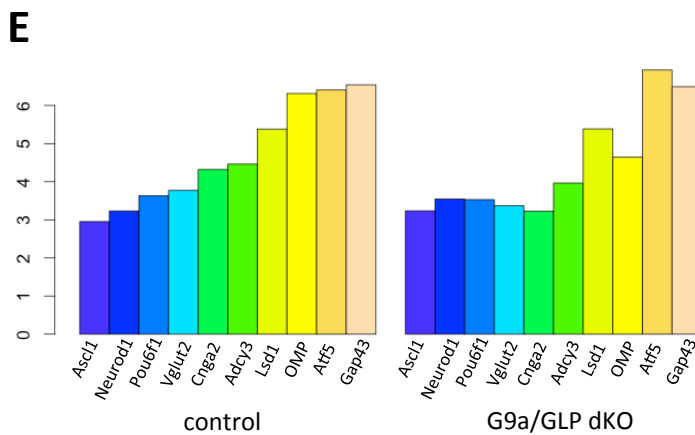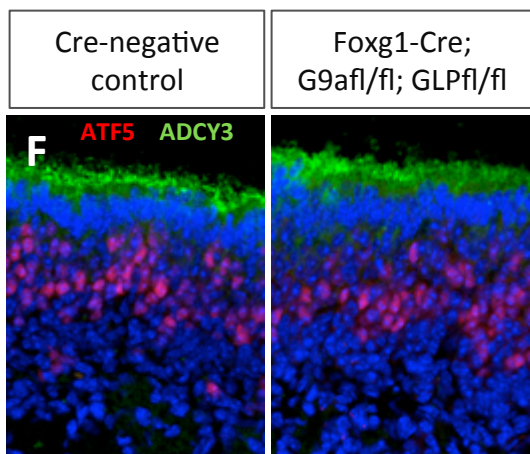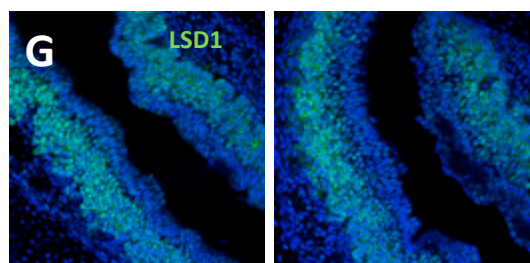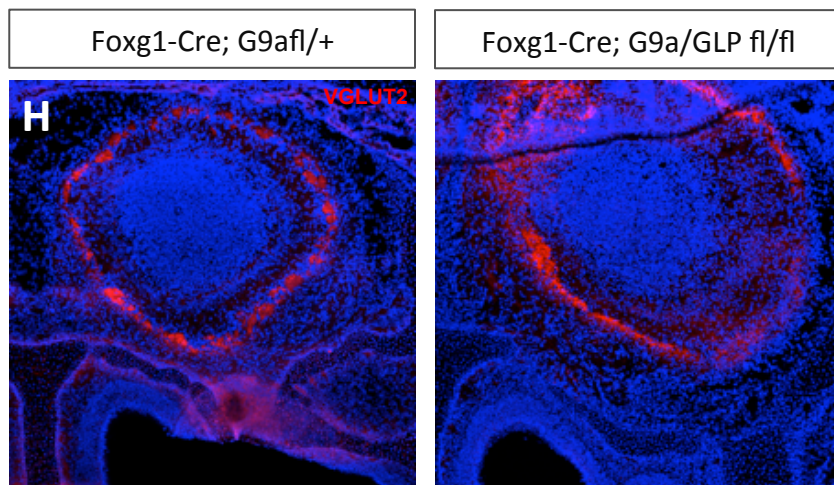

Figure S3

**A**

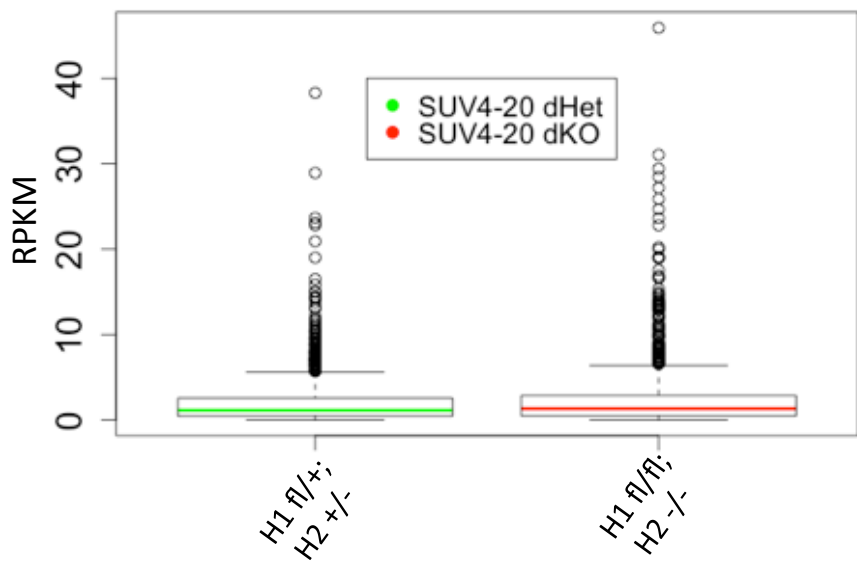

**B**

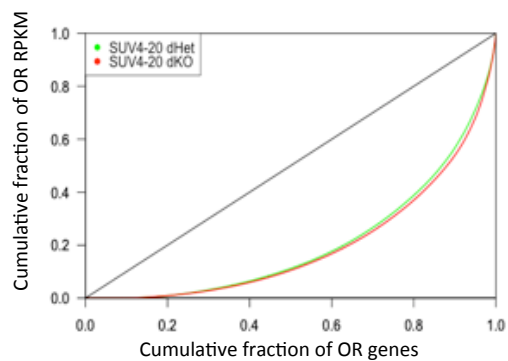

**C**

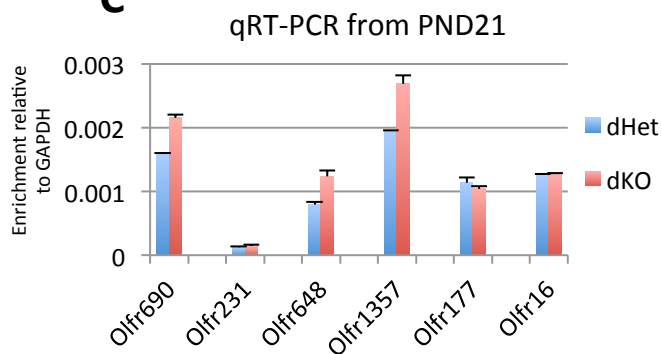

**D**

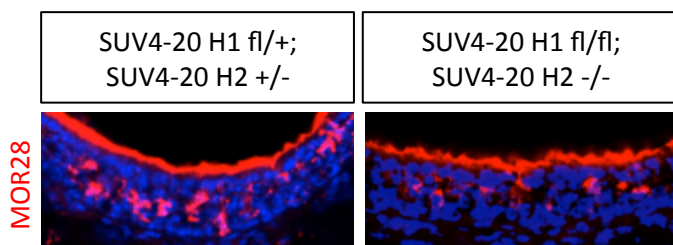

**E**

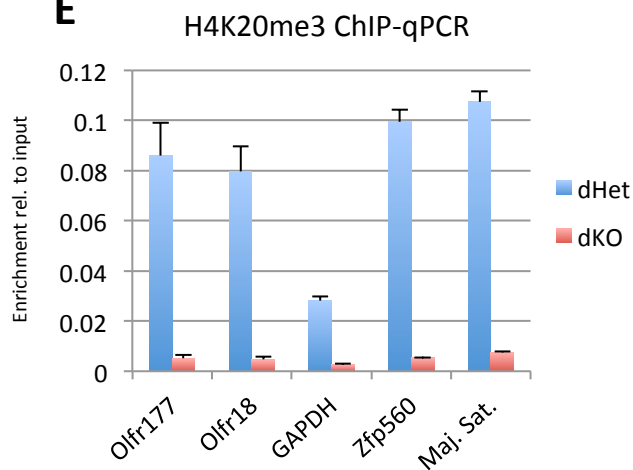

**F**

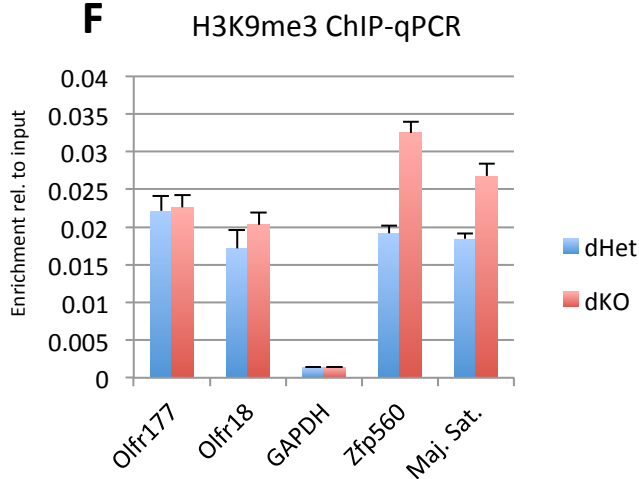



Figure S4

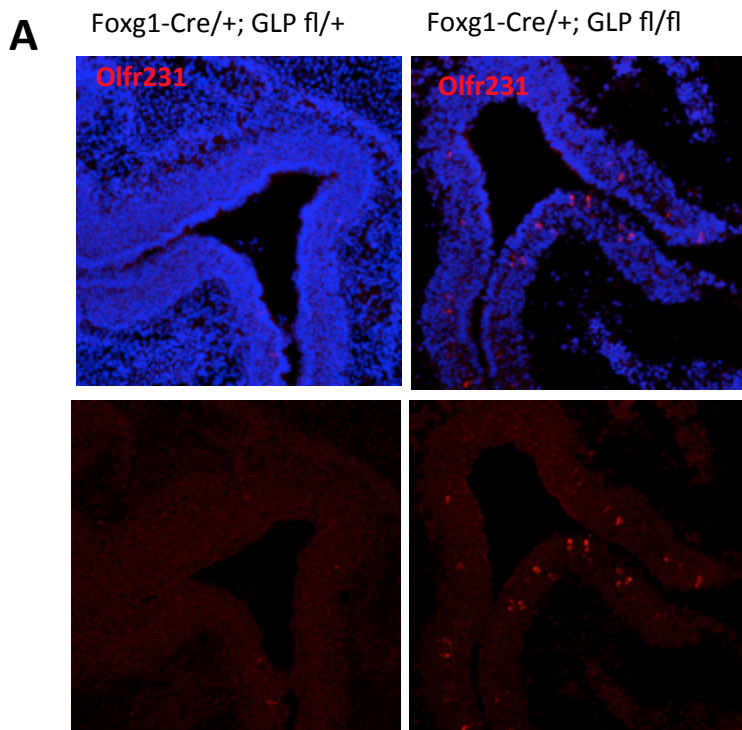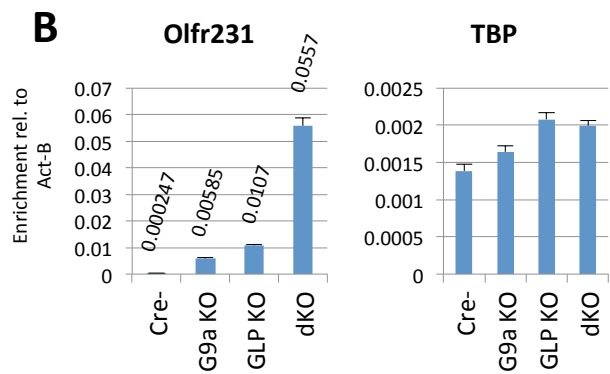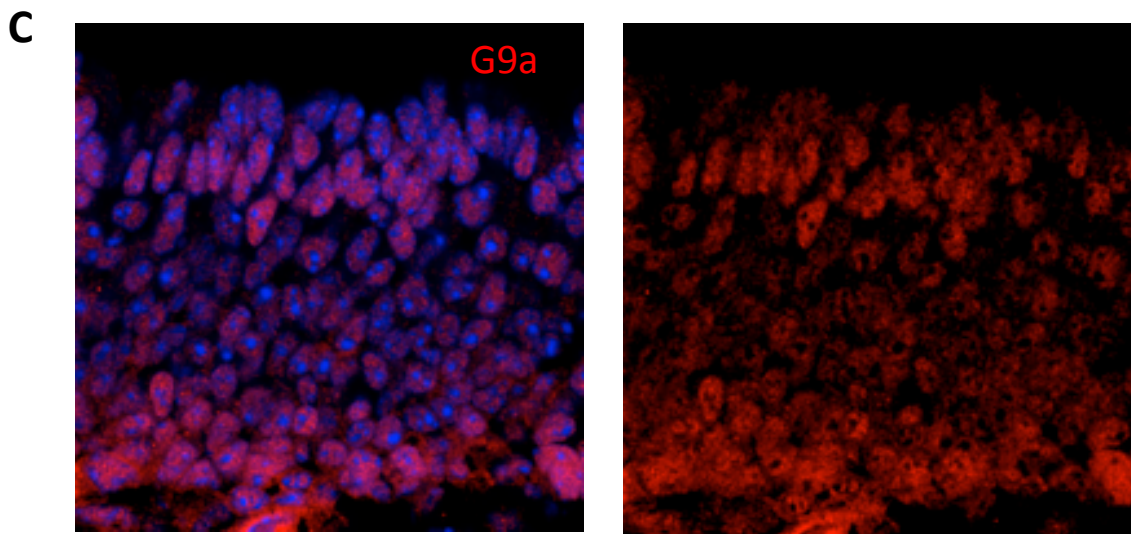

Supplement: NIHMS640841-supplement-1.pdf [file NIHMS640841-supplement-1.pdf]
